# Supplementary material for: Contrasting carbon cycle along tropical forest aridity gradients in West Africa and Amazonia
Source: PubMed Central journal article supplement (PMC11009382; doi:10.1038/s41467-024-47202-x), 2024-04-11
Supplement: 41467_2024_47202_MOESM1_ESM.pdf [file 41467_2024_47202_MOESM1_ESM.pdf]

1 **Supplementary for**

2 **Contrasting carbon cycle along tropical forest aridity gradients in West Africa and**  
3 **Amazonia**

4  
5 Huanyuan **Zhang-Zheng** 1, 2 \*, Stephen **Adu-Bredu** 3, 4, Akwasi **Duah-Gyamfi** 3, Sam  
6 **Moore** 1, Shalom D. **Addo-Danso** 3, Lucy **Amissah** 3, Riccardo **Valentini** 5, Gloria  
7 **Djagbletey** 3, Kelvin **Anim-Adjei** 3, John **Quansah** 3, Bernice **Sarpong** 3, Kennedy **Owusu-**  
8 **Afriyie** 3, Agne **Gvozdevaite** 1, Minxue **Tang** 6, Maria C. **Ruiz-Jaen** 7, Forzia **Ibrahim** 8,  
9 Cécile A.J. **Girardin** 1, Sami **Rifai** 9, Cecilia A. L. **Dahlsjö** 1, Terhi **Riutta** 1, Xiongjie **Deng**  
10 1, Yuheng **Sun** 10, Iain Colin **Prentice** 6,11, Imma **Oliveras Menor** 1,12, Yadvinder **Malhi**  
11 1, 2 \*

12  
13 \*Corresponding Author

14 1 Environmental Change Institute, School of Geography and the Environment, University of Oxford,  
15 Oxford, United Kingdom,

16 2 Leverhulme Centre for Nature Recovery, University of Oxford, United Kingdom,

17 3 Forestry Research Institute of Ghana, Council for Scientific and Industrial Research, Kumasi, Ghana

18 4 Department of Natural Resources Management, CSIR College of Science and Technology, Kumasi,  
19 Ghana

20 5 Centro Euro-Mediterraneo sui Cambiamenti Climatici, Lecce, Italy

21 6 Georgina Mace Centre for the Living Planet, Department of Life Sciences, Imperial College London,  
22 Silwood Park Campus, Buckhurst Road, Ascot, United Kingdom

23 7 Forestry Division, Food and Agriculture Organization of the United Nations, Panama City, Panama

24 8 Department of Forest Ecology, Faculty of Forestry and Wood Sciences, Czech University of Life  
25 Sciences, Praha, Czech Republic.

26 9 School of Biological Sciences, University of Adelaide, Adelaide, South Australia, Australia

27 10 Groningen Institute for Evolutionary Life Sciences, University of Groningen, P.O. Box 11103, 9700  
28 CC Groningen, The Netherlands

29 11 Department of Earth System Science, Ministry of Education Key Laboratory for Earth System  
30 Modeling, Institute for Global Change Studies, Tsinghua University, Beijing, China

31 12 AMAP (Botanique et Modelisation de l'Architecture des Plantes et des Végétations), CIRAD,  
32 CNRS, INRA, IRD, Université de Montpellier, Montpellier, France

33  
34 \*Corresponding emails: huanyuan.zhang@ouce.ox.ac.uk; yadvinder.malhi@ouce.ox.ac.uk

35  
36  
37 Please refer to 'figshare' (<https://doi.org/10.6084/m9.figshare.23615472>) data and code  
38 deposits associated with this manuscript for the full data set of carbon budget.  
39 all\_GPP\_together\_per\_plot.csv contains measurements of each carbon cycle component as a  
40 mean per plot. all\_GPP\_together\_per\_SITE.csv contains measurements of each carbon cycle  
41 component as a mean per site.

42

43

## 44 **Supplementary Method Field measurements and processing** 45 **procedure**

46

47 The procedure was written to ensure reproducibility of results and thus includes many  
48 processing details. Both Amazonia and West African aridity gradients show increasing  
49 seasonality toward dry sites. Since this paper focuses on the spatial variation of the carbon  
50 budget, not seasonal variation nor long-term spatial variation, here we average monthly  
51 measurements to an annual mean for both study gradients. Thus, the data processing procedure  
52 here may not be suitable for those focusing on seasonal variation.

53

54 Leaf area index (LAI) was estimated from hemispherical images taken with a Nikon 5100  
55 camera and Nikon Fisheye Converter FC-E8 0.21x JAPAN near the center of each of the 25  
56 subplots in each plot in each site, at a standard height of 1 m, and during overcast conditions.  
57 22,000 photos were collected in total, every month during 2016-2017(ANK), 2012-2017  
58 (BOB&KOG). Photos were processed using machine learning-based software ‘ilastik’<sup>1</sup> for  
59 pixel classification and CANEYE<sup>2</sup> for leaf area index calculations. The exposure procedure  
60 followed<sup>3</sup> and GEM manual<sup>4</sup> (<http://gem.tropicalforests.ox.ac.uk>). The following parameters  
61 were supplied to CANEYE.

62 (1) P1 = angle of view of the fish eye divided by the amount of pixels from the centroid  
63 of the fish eye circle to where the horizon is on the image.

64 (2) angle of view = 90 degree, in which case, the edge of the photo is the horizon and the  
65 centroid of the image is zenith.

- 66 (3) COI = 80, consideration of field is 80 degrees, we don't want the edge of the photo  
67 because it is not clear and sometime obscure by tall grasses or saplings.
- 68 (4) Sub sample factor =1
- 69 (5) Fcover = 20 degree, this is to calculate the percentage of black pixels within the  
70 central 20-degree ring. We used this to understand the relative openness of canopy for  
71 the given image. It is not relevant to LAI
- 72 (6) PAIsat = 10, When a pixel is completely black, mathematically, the leaf area index  
73 (LAI) is infinite. As we provide CANEYE 25 subplot images for each estimation of  
74 LAI, this means all 25 subplot images show black at a given pixel. To address this  
75 'infinite' issue, we use a value of 10 for LAI in such cases. This value is based on the  
76 guess that, the densest point in a tropical forest should have an LAI of 10.
- 77 (7) Latitude 0 and Day of Year a random number (not relevant for tropical site LAI)
- 78

79 Then, we extract output from CANEYE using software R. We chose the latest method of  
80 LAI calculation offered by CANEYE, 'CE V6.1 True PAI'. CANEYE reported one LAI value  
81 per method (4 methods) per plot per site per month, as a synthesis across 25 subplots images.  
82 As systematic error is dominating in LAI calculation, we take the standard deviation of LAI  
83 across four methods as the uncertainty for LAI.

84 Canopy respiration ( $R_{\text{leaf}}$ ) is calculated as plot-mean LAI multiplied by plot-mean  
85 leaf dark respiration ( $R_{\text{dark}}$ ), a leaf gas exchange measurement. To obtain the leaves, branches  
86 for both sun leaves and shade leaves were detached and immediately re-cut under water to  
87 restore hydraulic connectivity for subsequent gas exchange measurement. The leaves were  
88 fully darkened for 30 min prior to measuring  $R_{\text{dark}}$ .  $R_{\text{dark}}$  was measured using an open flow  
89 gas exchange system (LI-6400XT, Li-Cor Inc., Lincoln, NE, USA) and block temperature was  
90 kept constant throughout the sampling period at 30° C. The uncertainty of  $R_{\text{dark}}$  was calculated  
91 as the standard error of raw measurements<sup>5</sup>. We convert measurements of  $R_{\text{dark}}$  from 30  
92 degree to mean annual air temperature following<sup>6</sup>.  $R_{\text{dark}}$  was measured for sun and shade  
93 leaves and from wet to dry seasons. We calculate a basal area community weighted mean for

94 R<sub>dark\_sun</sub> and R<sub>dark\_shade</sub>. Then, we calculate canopy respiration per plot using: R<sub>leaf</sub> =  
95 R<sub>dark\_sun</sub> \* F<sub>sunlit</sub> + R<sub>dark\_shade</sub>\* (1 – F<sub>sunlit</sub>), where F<sub>sunlit</sub> is the sunlit leaf area. It  
96 is calculated as F<sub>sunlit</sub> = (1 – exp(– K\*LAI))/K where K is the light extinction coefficient <sup>7</sup>.  
97 The final canopy total respiration was calculated as R<sub>leaf</sub> \* 0.67 to account for daytime light  
98 inhibition of leaf dark respiration <sup>8</sup>.

99

100 Above-ground live wood respiration (R<sub>stem</sub>), was quantified at monthly intervals by  
101 measuring rates of CO<sub>2</sub> accumulation to chambers attached to the tree trunk, and scaling using  
102 stem surface area allometries, using a previously-developed equation<sup>9</sup>. Bole respiration per unit  
103 surface area was measured using wood respiration closed dynamic chamber method, from at  
104 least 50 trees covering dominating species distributed evenly throughout each plot at 1.3 m  
105 height with an IRGA (EGM-4) and soil respiration chamber (SRC-1) connected to a permanent  
106 collar. The uncertainty of bole respiration per unit surface area was calculated as the standard  
107 error of raw measurements. To recognise the large uncertainty of total stem surface area, mostly  
108 due to the simple allometric equation, we assigned an uncertainty of 30%.

109

110 Coarse root respiration (R<sub>coarse\_root</sub>) was not measured, by estimated by R<sub>stem</sub>  
111 multiplied by 0.21 ± 0.10, following <sup>10–12</sup>.

112

113 Total soil CO<sub>2</sub> efflux (R<sub>soil</sub>), called R<sub>soil\_no\_coarseroot\_with\_litter</sub> in the raw data  
114 sheet, was measured every month at the same point in each of the 25 sub-plots on each plot. It  
115 was measured using a closed dynamic chamber method with an infra-red gas analyser and soil  
116 respiration chamber (EGM-4 IRGA and SRC-1 chamber, PP Systems, Hitchin, UK) sealed to  
117 a permanent collar in the soil. Coarse root respiration was assumed missed by the above method

118 <sup>12</sup>. The uncertainty of R\_soil\_no\_coarseroot\_with\_litter was calculated as the standard error of  
119 raw measurements.

120

121 Therefore, the R\_soil\_no\_coarseroot\_with\_litter is composed of R\_rhizosphere  
122 (including fine roots, mycorrhizal and exudates) respiration, soil organic matter derived  
123 respiration (R\_soil\_heterotrophic), and soil surface fine litter respiration (R\_fine\_litter). The  
124 percentage of each component was determined by using a partitioning experiment similar to  
125 that described in <sup>13,14</sup>.

126

127 Root exudates NPP was not directly measured while mycorrhizal respiration was  
128 incorporated in R\_rhizosphere in R\_a, bringing uncertainty to GPP and CUE. Following <sup>14</sup>, We  
129 estimated the root exudation rate from literature as (i) 6% of total NPP <sup>15</sup> (ii) 59% of root NPP  
130 <sup>16</sup>, (iii) 37% of root respiration (calculated from data in <sup>17</sup>)

131

132 Coarse woody debris respiration and dead wood respiration was not directly measured,  
133 which affect the estimates of carbon sink (net ecosystem exchange) but is irrelevant to GPP  
134 nor CUE. A study of Amazonia lowland intact forest found CWD respiration as 76% of CWD  
135 input, where a steady state ( $D_{cwd} = D_{cwd\_to\_soil} + R_{cwd}$ ) was assumed <sup>18</sup>. However, the  
136 proportion of CWD respired could be rather variable <sup>19</sup>; A recent study at the Borneo lowland  
137 forests reported a 90% <sup>20</sup>. In this study, we estimated R\_cwd as  $(0.9+0.76)/2 = 0.83$  of D\_cwd,  
138 with  $\pm 0.1$  uncertainty.

139

140 This study sources stem biomass (or called above-ground coarse woody biomass,  
141 estimated from tree height and girth) and some NPP components from <sup>21</sup>. However, it is worth  
142 noting that the study is limited in that some minor components (in terms of magnitude) of the

143 carbon cycle were not covered by this study. For instance, Volatile organic compound NPP  
144 was found to be a very minor component of the carbon cycle of an Amazonian Forest <sup>8</sup>. Ground  
145 flora was neglected in ANK and BOB due to their relatively low abundance, and was included  
146 in KOG, a forest to savanna transition zone. Epiphytes and liana were also not counted albeit  
147 their wide existence in the field, especially in BOB01.

148       When combining or multiplying different components of the carbon cycle, uncertainties  
149 were propagated following <sup>8</sup>.

150

## 151       **Supplementary 2: Correlation between NPP and GPP**

152       Here we presented the correlation between Gross primary productivity (GPP), net primary  
153 productivity (NPP) and carbon use efficiency (CUE). Please note that GPP and NPP in this  
154 study are calculated as the sum of various components (see Supplementary Data 1). CUE is  
155 calculated as  $NPP/GPP$ . The regression shows for example how well the spatial variation of  
156 GPP captured the spatial variation of NPP.

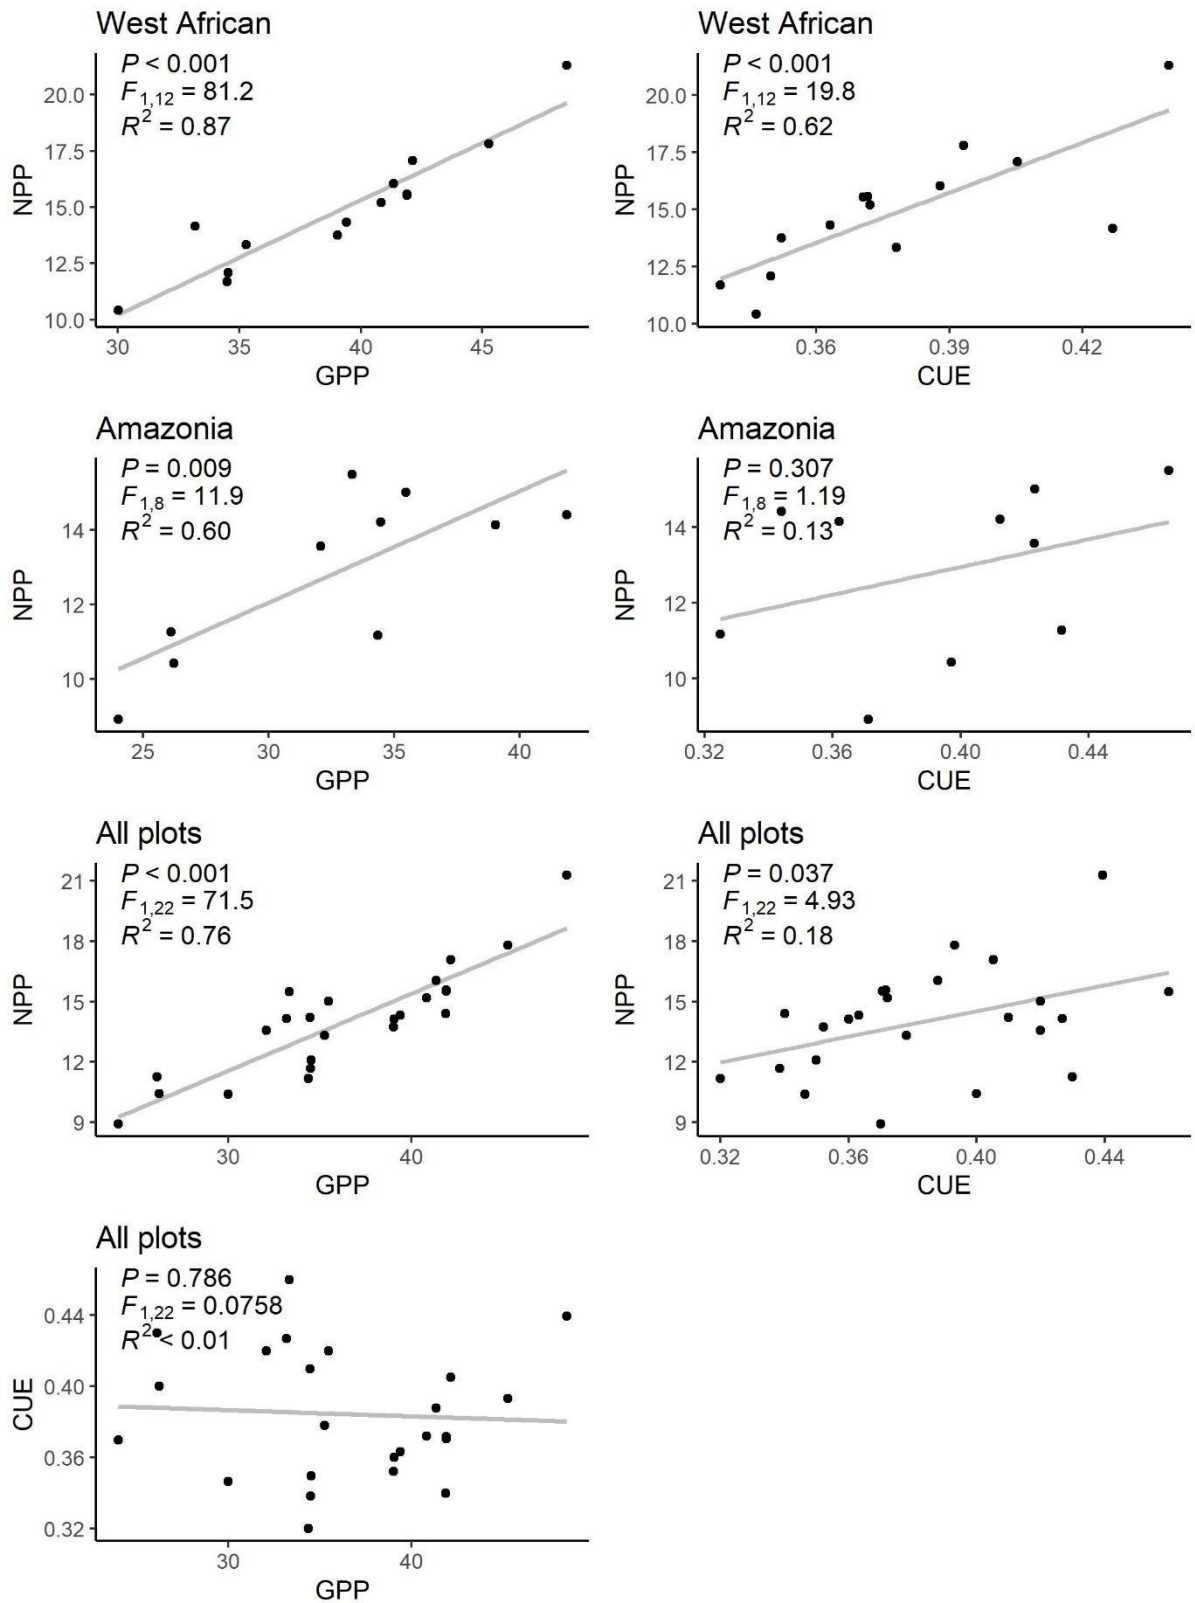

157

158 *Figure S 1. Linear regression between gross primary productivity (GPP) and net primary*  
 159 *productivity (NPP) both in unit ( $\text{Mg C ha}^{-1} \text{ yr}^{-1}$ ). The figure shows results for West African plots,*  
 160 *Amazonian plots and all plots together.*

161

162

163

### Supplementary 3 Plots information

164

165 *Table S 1 Study plots information. All are one-hectare plots. The table is also available on online*  
 166 *source data deposit.*

167

| Plot_code | RH (%) | Rdark shade | Rdark sun | vwc (%) | MCWD (mm) | MAT (°C) | MAP (mm) | Lat      | Lon       |
|-----------|--------|-------------|-----------|---------|-----------|----------|----------|----------|-----------|
| ALP-01    | 89.2   | -0.67       | -0.56     | 26.8    | -6        | 25.2     | 2689     | -3.95    | -73.4333  |
| ALP-30    | 89.2   | -0.79       | -0.89     | 10.8    | -6        | 25.2     | 2689     | -3.9543  | -73.4267  |
| ANK-03    | 91     | -1.22       | -1.71     | 11.63   | -13       | 25       | 2050     | 5.27102  | -2.69234  |
| ANK-02    | 91     | -1.25       | -1.75     | 6.78    | -13       | 25       | 2050     | 5.268485 | -2.695035 |
| ANK-01    | 91     | -1.18       | -1.69     | 5.96    | -13       | 25       | 2050     | 5.267868 | -2.693635 |
| CAX-06    | 82.4   | -0.44       | -0.44     | 27.1    | -203      | 25.8     | 2311     | -1.7369  | -51.46194 |
| CAX-04    | 82.4   | -0.365      | -0.365    | 22.4    | -203      | 25.8     | 2311     | -1.716   | -51.457   |
| TAM-06    | 89.6   | -0.495      | -0.53     | 35.5    | -259      | 24.4     | 1900     | -12.8385 | -69.296   |
| TAM-05    | 89.6   | -0.79       | -0.655    | 21.8    | -259      | 24.4     | 1900     | -12.8309 | -69.2705  |
| BOB-03    | 83.9   | -1.56       | -1.86     | 11.37   | -374      | 25.7     | 1500     | 6.694531 | -1.293695 |
| BOB-04    | 83.9   | -1.47       | -1.88     | 9.42    | -374      | 25.7     | 1500     | 6.69096  | -1.317038 |
| BOB-05    | 83.9   | -1.47       | -1.76     | 8.64    | -374      | 25.7     | 1500     | 6.692606 | -1.30727  |
| BOB-06    | 83.9   | -1.47       | -1.75     | 8.19    | -374      | 25.7     | 1500     | 6.691368 | -1.307001 |
| BOB-02    | 83.9   | -1.54       | -1.83     | 7.87    | -374      | 25.7     | 1500     | 6.69147  | -1.338429 |
| BOB-01    | 83.9   | -1.57       | -1.9      | 6.4     | -374      | 25.7     | 1500     | 6.704713 | -1.319068 |
| KEN-01    | 80.8   | -0.655      | -0.815    | 19.7    | -386      | 23.4     | 1310     | -16.0158 | -62.7301  |
| KEN-02    | 80.8   | no shade    | -0.775    | 16      | -386      | 23.4     | 1310     | -16.0158 | -62.7301  |
| KOG-02    | 79.2   | -1.59       | -2.08     | 4.13    | -412      | 26.4     | 1200     | 7.262316 | -1.149953 |
| KOG-03    | 79.2   | -1.69       | -2.12     | 2.9     | -412      | 26.4     | 1200     | 7.306792 | -1.156446 |
| KOG-05    | 79.2   | -1.91       | -2.39     | 2.54    | -412      | 26.4     | 1200     | 7.305341 | -1.164546 |
| KOG-04    | 79.2   | -1.78       | -2.32     | 2.42    | -412      | 26.4     | 1200     | 7.302644 | -1.180213 |
| KOG-06    | 79.2   | -1.9        | -2.34     | 1.72    | -412      | 26.4     | 1200     | 7.329423 | -1.15578  |
| TAN-01    | 74.09  | No data     | No data   | 10.8    | -482      | 25       | 1770     | -13.0765 | -52.3858  |
| TAN-02    | 74.09  | No data     | No data   | 10.7    | -482      | 25       | 1770     | -13.0765 | -52.3858  |

Note: (1) Leaf dark respiration and relative humidity are from <sup>5,12,22-27</sup> (2) At site CAX, leaf dark respiration is from <sup>28</sup>, information on sun/shade leaves were not provided. (3) For CAX, leaf dark respiration is standardized to 25 degrees. For ANK, BOB and KOG, leaf dark respiration is standardized to mean annual air temperature. Information on temperature standardization is not provided in the cited publications for remaining sites. (4) Volumetric water content (vwc) at site ANK, BOB and KOG are measurements of topsoil (12 cm) only, but vwc at site ALP, TAM, KEN, CAX, and TAN are measurements of top 30 cm. This data is provided for reference only and are not suggested for any quantitative analysis. (5) RH = relative humidity; Rdark = leaf dark respiration for shade or sun leaves; vwc=



volumetric water content, indicating surface soil moisture; MCWD = maximum climatological water deficit; MAT= mean annual air temperature; MAP = mean annual air precipitation; Lat = latitude; Lon = longitude. Plots are ranked by MCWD.

168

169

170

*Table S1 continued*

| Plot   | Elev | PPFD                      | Trees   | P       | N    | C    | Ca      | K       | Mg      | Sand  | Clay  |
|--------|------|---------------------------|---------|---------|------|------|---------|---------|---------|-------|-------|
|        | (m)  | (mol/m <sup>2</sup> /day) | (#/ha)  | (mg/kg) | (%)  | (%)  | (mg/kg) | (mg/kg) | (mg/kg) | (%)   | (%)   |
| ALP-01 | 120  | 29.49                     | 589     | 125.6   | 0.1  | 1.19 |         |         |         | 65    | 15    |
| ALP-30 | 150  | 29.49                     | 479     | 37.6    | 0.08 | 1.13 |         |         |         | 82    | 2     |
| ANK-03 | 86   | 30.97                     | 517     | 109.7   | 0.12 | 1.91 | 40      | 33.7    | 29.2    | 75.9  | 12.8  |
| ANK-02 | 124  | 30.97                     | 445     | 146.8   | 0.17 | 2.61 | 26.8    | 32.3    | 42      | 63.1  | 21.6  |
| ANK-01 | 114  | 30.97                     | 476     | 146.8   | 0.17 | 2.61 | 26.8    | 32.3    | 42      | 63.1  | 21.6  |
| CAX-06 | 47   | 32.33                     | 448     | 178.5   | 0.13 | 1.68 |         |         |         | 32.54 | 53.76 |
| CAX-04 | 47   | 32.33                     | no data | 37.4    | 0.06 | 0.83 |         |         |         | 83.69 | 10.68 |
| TAM-06 | 215  | 27.22                     | 667     | 528.8   | 0.17 | 1.2  |         |         |         | 2     | 46    |
| TAM-05 | 223  | 27.22                     | 556     | 256.3   | 0.16 | 1.51 |         |         |         | 40    | 44    |
| BOB-03 | 294  | 35.58                     | 631     |         |      |      |         |         |         |       |       |
| BOB-04 | 272  | 35.58                     | 506     |         |      |      |         |         |         |       |       |
| BOB-05 | 246  | 35.58                     | 527     |         |      |      |         |         |         |       |       |
| BOB-06 | 278  | 35.58                     | 545     |         |      |      |         |         |         |       |       |
| BOB-02 | 281  | 35.58                     | 789     | 258.3   | 0.16 | 1.71 | 657.6   | 49      | 133.7   | 46.7  | 28.8  |
| BOB-01 | 277  | 35.58                     | 519     | 77.8    | 0.09 | 0.8  | 306.3   | 47.6    | 79.7    | 64.2  | 6.7   |
| KEN-01 | 384  | 33.46                     | 465     | 447.1   | 0.22 | 2.4  |         |         |         | 58.05 | 19.13 |
| KEN-02 | 384  | 33.46                     | 470     | 244.7   | 0.17 | 2    |         |         |         | 55.48 | 18.25 |
| KOG-02 | 229  | 44.26                     | 197     | 67.2    | 0.06 | 0.72 | 378.9   | 42.5    | 75.6    | 82.4  | 2.3   |
| KOG-03 | 198  | 44.26                     | 216     |         |      |      |         |         |         |       |       |
| KOG-05 | 221  | 44.26                     | 193     | 81.9    | 0.04 | 0.62 | 237.1   | 28.7    | 81.3    | 76.9  | 4.3   |
| KOG-04 | 230  | 44.26                     | 234     | 74.6    | 0.05 | 0.67 | 308     | 35.6    | 78.7    | 79.7  | 3.3   |
| KOG-06 | 195  | 44.26                     | 202     |         |      |      |         |         |         |       |       |
| TAN-01 | 385  | 38.22                     | 370     | 147     | 0.16 | 2.55 |         |         |         | 45.73 | 48.9  |
| TAN-02 | 385  | 38.22                     | 387     | 147     | 0.16 | 2.55 |         |         |         | 45.73 | 48.9  |

Note: Plots are ranked by MCWD; Empty cells are due to the lack of data. Elev, elevation; MAP, mean annual precipitation; PPFD, photosynthetic photon flux density, calculated from shortwave radiation \*0.45; Trees, total number of trees larger than 10cm diameter at breast height, as this number changes from year to year, the first year is picked if a plot has multiple years censuses; Soil nutrients (P, phosphorus; N, nitrogen; C, carbon; Ca, calcium; Mg, magnesium), and soil percentage of sand (Sand) and of clay (Clay). Parts of the data are from <sup>5,21,27,29</sup>

171

172

*Table S1 continued*

| Plot   | Silt  | Seasonality index | Asat                                     | Amax                                     | Leaf lifespan |
|--------|-------|-------------------|------------------------------------------|------------------------------------------|---------------|
|        | (%)   | unitless          | ( $\mu\text{mol m}^{-2} \text{s}^{-1}$ ) | ( $\mu\text{mol m}^{-2} \text{s}^{-1}$ ) | (year)        |
| ALP-01 | 20    | 0.23              | 7.5 ± 4.4                                | 17.4 ± 6.1                               |               |
| ALP-30 | 16    | 0.23              | 6.7 ± 3.2                                | 16.1 ± 6.2                               |               |
| ANK-03 | 11.4  | 0.33              | 5.954 ± 0.53                             | 18.57                                    |               |
| ANK-02 | 15.3  | 0.33              |                                          |                                          | 0.827         |
| ANK-01 | 15.3  | 0.33              | 4.568 ± 0.27                             | 15.88                                    | 0.768         |
| CAX-06 | 13.7  | 0.68              |                                          |                                          | 1.45          |
| CAX-04 | 5.64  | 0.68              |                                          |                                          | 3             |
| TAM-06 | 52    | 0.58              | 9.4 ± 3.5                                | 22.6 ± 3.6                               | 1.42          |
| TAM-05 | 17    | 0.58              | 9.5 ± 2.7                                | 22.2 ± 3.6                               | 1.3           |
| BOB-03 |       | 0.44              |                                          |                                          |               |
| BOB-04 |       | 0.44              |                                          |                                          |               |
| BOB-05 |       | 0.44              |                                          |                                          |               |
| BOB-06 |       | 0.44              |                                          |                                          |               |
| BOB-02 | 24.5  | 0.44              | 7.210 ± 0.24                             | 21.738                                   | 0.432         |
| BOB-01 | 26.8  | 0.44              | 7.402 ± 0.49                             | 21.823                                   | 0.341         |
| KEN-01 | 22.82 | 0.55              |                                          |                                          | 1.05          |
| KEN-02 | 26.27 | 0.55              |                                          |                                          | 1.01          |
| KOG-02 | 15.34 | 0.53              | 6.985 ± 0.26                             | 21.017                                   | 0.801         |
| KOG-03 |       | 0.53              |                                          |                                          | 0.653         |
| KOG-05 | 18.71 | 0.53              | 7.728 ± 0.53                             | 20.654                                   | 0.554         |
| KOG-04 | 17.02 | 0.53              | 7.470 ± 0.53                             | 22.866                                   | 0.555         |
| KOG-06 |       | 0.53              |                                          |                                          |               |
| TAN-01 | 5.37  | 0.78              |                                          |                                          | 1.04          |
| TAN-02 | 5.37  | 0.78              |                                          |                                          | 1.04          |

Note: Asat is light-saturated net photosynthesis measured under 400 ppm atmospheric CO<sub>2</sub>, Amax is light-saturated net photosynthesis measured under 2000 ppm atmospheric CO<sub>2</sub>. Measurements source from previous studies<sup>5,30</sup>. Leaf lifespan sources from these<sup>21,31</sup>. Seasonality Index is calculated as the sum of the absolute distance between monthly rainfall and mean rainfall, following<sup>32</sup>, using ERA5-Land monthly precipitation<sup>33</sup>.

173

174

175

176

177

*Table S 2 Mean and Standard error (SE) of gross primary production (GPP) and its components across study plots for Amazonia and West African forests. Please note that the standard error is associated with the mean across plots. The standard error thus represents spatial variation, different*

178 to the standard error in Figure 2 which sources from error propagation and represents measurement  
 179 uncertainty. Welch two sample t-test was used to examine the difference between Amazonian and  
 180 West African forests. Soil moisture is soil volumetric water content (%) measured from 12cm depth.  
 181 See Supplementary Data 1 for full names and definitions of carbon budget components. All units are  
 182 MgC ha<sup>-1</sup> year<sup>-1</sup>

|                      | Amazonia<br>Mean | Amazonia<br>SE | West<br>African<br>Mean | West<br>African<br>SE | Welch two sample t-test                       |
|----------------------|------------------|----------------|-------------------------|-----------------------|-----------------------------------------------|
| GPP                  | 32.71            | 1.82           | 39.13                   | 1.35                  | t = -2.8304, df = 17.884, p-value = 0.01114   |
| CUE                  | 0.39             | 0.01           | 0.38                    | 0.01                  | t = 0.92143, df = 14.792, p-value = 0.3716    |
| NPP                  | 12.86            | 0.71           | 14.87                   | 0.74                  | t = -1.9682, df = 21.592, p-value = 0.06202   |
| NPP_all_stem         | 3.01             | 0.21           | 2.37                    | 0.28                  | t = 1.8598, df = 21.758, p-value = 0.07649    |
| NPP_fine_litter_fall | 5.22             | 0.31           | 5.36                    | 0.67                  | t = -0.17942, df = 18.042, p-value = 0.8596   |
| R_autotrophic        | 19.84            | 1.35           | 24.26                   | 0.71                  | t = -2.8859, df = 13.952, p-value = 0.01201   |
| NPP_fineroot         | 3.06             | 0.35           | 3.54                    | 0.24                  | t = -1.119, df = 16.996, p-value = 0.2787     |
| R_rhizosphere        | 4.24             | 0.37           | 2.77                    | 0.25                  | t = 3.3144, df = 16.812, p-value = 0.00415    |
| R_leaf               | 6.87             | 0.70           | 12.40                   | 0.51                  | t = -6.3666, df = 17.709, p-value = 5.794e-06 |
| R_stem               | 7.23             | 0.64           | 7.51                    | 0.27                  | t = -0.40703, df = 12.267, p-value = 0.691    |
| Soil_Moisture        | 20.16            | 2.62           | 6.43                    | 0.88                  |                                               |

183

184

185

186 *Table S 3 Mean and Standard error (SE) of percentage allocation of net primary production (NPP)*  
 187 *and autotrophic respiration (R) across study plots for Amazonia and West African forests. Paired t-test*  
 188 *was used to examine the difference between Amazonia and West African forests (24 one-hectare plots,*  
 189 *so df=23). All values are unitless. Measurements source from previous studies<sup>5,30</sup>. 'Overall' is an*  
 190 *average across Amazonia and West Africa.*

191

192

|                                                                                                                                                                                                                                                                                                                                                                                                                                                                                                            | Overall SE | Overall Mean | Amazonia SE | West African SE | Amazonia Mean | West African Mean |
|------------------------------------------------------------------------------------------------------------------------------------------------------------------------------------------------------------------------------------------------------------------------------------------------------------------------------------------------------------------------------------------------------------------------------------------------------------------------------------------------------------|------------|--------------|-------------|-----------------|---------------|-------------------|
| NPP canopy allocation                                                                                                                                                                                                                                                                                                                                                                                                                                                                                      | 0.023      | 0.421        | 0.024       | 0.036           | 0.412         | 0.427             |
| NPP woody allocation                                                                                                                                                                                                                                                                                                                                                                                                                                                                                       | 0.018      | 0.311        | 0.017       | 0.027           | 0.333         | 0.296             |
| NPP fine root allocation                                                                                                                                                                                                                                                                                                                                                                                                                                                                                   | 0.015      | 0.259        | 0.023       | 0.020           | 0.234         | 0.278             |
| R canopy allocation                                                                                                                                                                                                                                                                                                                                                                                                                                                                                        | 0.021      | 0.441        | 0.024       | 0.011           | 0.345         | 0.510             |
| R wood allocation                                                                                                                                                                                                                                                                                                                                                                                                                                                                                          | 0.015      | 0.403        | 0.029       | 0.012           | 0.442         | 0.376             |
| R fine root allocation                                                                                                                                                                                                                                                                                                                                                                                                                                                                                     | 0.013      | 0.155        | 0.012       | 0.010           | 0.213         | 0.114             |
| Paired T test comparing NPP allocation:<br>(1) canopy to woody: t = 2.8818, df = 23, p-value = 0.00842<br>(2) canopy to fine root: t = 4.7066, df = 23, p-value = 9.672e-05<br>(3) woody to fine root: t = -2.277, df = 23, p-value = 0.03241<br><br>Paired T test comparing Autotrophic allocation:<br>(1) canopy to woody: t = 1.117, df = 23, p-value = 0.2755<br>(2) canopy to fine root: t = 9.405, df = 23, p-value = 2.401e-09<br>(3) woody to fine root: t = -12.929, df = 23, p-value = 4.923e-12 |            |              |             |                 |               |                   |

193

194

195 *Table S 4 light-saturated net photosynthesis measured under 400 ppm atmospheric CO<sub>2</sub> (Asat),*  
 196 *and light-saturated net photosynthesis measured under 2000 ppm atmospheric CO<sub>2</sub> (Amax) of*  
 197 *common species at study the study sites. Unit is (μmol m<sup>-2</sup> s<sup>-1</sup>). Basal Area is the total basal area of a*  
 198 *given species (unit mm<sup>2</sup>); Count is the number of individuals of a given species. Please note that only*  
 199 *some common species are provided. For light saturated assimilation rate at 400 ppm, Asat (umol CO<sub>2</sub>*  
 200 *m-2 s-1) and at 2000ppm, Amax (umol CO<sub>2</sub>m-2 s-1), The branch that had been cut was promptly placed*  
 201 *in water and recut. To measure leaf gas exchange traits, an open flow gas exchange system (LI-6400XT,*  
 202 *Li-Cor Inc., Lincoln, NE, USA) was used. Three leaves were selected from each tree and analyzed for*  
 203 *Asat and Amax. The photosynthetic photon flux density was set at 2000 μmol m-2 s-1. The block*  
 204 *temperature was kept constant at 30° C throughout the sampling period, which was similar to the*  
 205 *ambient air temperature.*

| Plot | Genus | Species | Asat | BasalArea | Count | Amax |
|------|-------|---------|------|-----------|-------|------|
|------|-------|---------|------|-----------|-------|------|

|        |                |               |          |          |     |          |
|--------|----------------|---------------|----------|----------|-----|----------|
| ANK-01 | Cynometra      | ananta        | 4.537    | 6951650  | 40  | 18.509   |
| ANK-01 | Uapaca         | corbisieri    | 4.713    | 2995388  | 14  | 13.658   |
| ANK-01 | Strephonema    | pseudocola    | 4.96     | 1758334  | 19  | 15.805   |
| ANK-01 | Heritiera      | utilis        | 5.526    | 1558052  | 17  | 16.909   |
| ANK-01 | Dacryodes      | klaineana     | 4.091    | 1120238  | 18  | 13.224   |
| ANK-03 | Protomegabaria | macrophylla   | 4.252    | 3968181  | 101 | 15.327   |
| ANK-03 | Uapaca         | corbisieri    | 8.015    | 3061876  | 9   | 18.643   |
| ANK-03 | Strephonema    | pseudocola    | 5.286    | 2154328  | 18  | 17.068   |
| ANK-03 | Heritiera      | utilis        | 7.949    | 1575264  | 19  | 23.802   |
| ANK-03 | Cleistopholis  | patens        | 6.961    | 1525673  | 9   | 24.293   |
| BOB-01 | Celtis         | mildbraedii   | 6.828    | 5161832  | 76  | 21.007   |
| BOB-01 | Nesogordonia   | papaverifera  | 8.709    | 2336989  | 26  | 22.73    |
| BOB-01 | Triplochiton   | scleroxylon   | 8.572    | 1959843  | 11  | 25.227   |
| BOB-01 | Hannoa         | klaineana     | 5.903    | 1566631  | 20  | 22.46    |
| BOB-01 | Cola           | gigantea      | 5.931    | 720700.2 | 16  | 14.306   |
| BOB-02 | Triplochiton   | scleroxylon   | 8.385    | 6031773  | 25  | 24.849   |
| BOB-02 | Celtis         | mildbraedii   | 4.609    | 4804028  | 82  | 16.548   |
| BOB-02 | Funtumia       | elastica      | 10.006   | 2945646  | 153 | 27.193   |
| BOB-02 | Celtis         | zenkeri       | 4.431    | 1828924  | 55  | 16.593   |
| BOB-02 | Nesogordonia   | papaverifera  | 7.229    | 1782720  | 38  | 20.36    |
| KOG-02 | Dacryodes      | klaineana     | 4.495    | 3277066  | 18  | 15.695   |
| KOG-02 | Cola           | gigantea      | 6.684    | 2875349  | 23  | 19.891   |
| KOG-02 | Ceiba          | pentandra     | 8.519    | 1802779  | 9   | 24.131   |
| KOG-02 | Afzelia        | africana      | 7.505    | 1610019  | 7   | 22.846   |
| KOG-02 | Khaya          | grandifoliola | 5.766    | 1132927  | 4   | 20.101   |
| KOG-04 | Pterocarpus    | erinaceus     | 7.688    | 1667214  | 25  | 22.3     |
| KOG-04 | Manilkara      | multinervis   | 8.244    | 1629990  | 14  | 21.949   |
| KOG-04 | Sterculia      | tragacantha   | 7.272    | 1610797  | 63  | 23.24    |
| KOG-04 | Lanea          | velutina      | 3.458    | 981867.9 | 8   | 14.945   |
| KOG-04 | Afzelia        | africana      | 12.393   | 952962.9 | 3   | 32.673   |
| KOG-05 | Pterocarpus    | erinaceus     | 8.394    | 2578922  | 24  | 22.796   |
| KOG-05 | Anogeissus     | leiocarpus    | 10.974   | 2066544  | 11  | 22.033   |
| KOG-05 | Terminalia     | schimperiana  | 7.785    | 1563494  | 15  | 21.787   |
| KOG-05 | Vitellaria     | paradoxa      | 4.387019 | 1344279  | 10  | 15.46    |
| KOG-05 | Bridelia       | ferruginea    | 5.380399 | 918256.1 | 51  | 20.02857 |
| TAM-05 | Ampelocera     | edentula      | 6        |          |     | 17.2     |
| TAM-05 | Bixa           | arborea       | 13       |          |     | 22.6     |
| TAM-05 | Ocotea         | bofo          | 9.5      |          |     | 20.6     |
| TAM-05 | unidentified   | unidentified  | 6.6      |          |     | 21.2     |

|        |               |                          |      |  |      |
|--------|---------------|--------------------------|------|--|------|
| TAM-05 | Pouteria      | torta subsp. tuberculata | 6.8  |  | 25.9 |
| TAM-05 | Huberodendron | switenioides             | 10.6 |  | 20.5 |
| TAM-05 | Miconia       | pyrifolia                | 11.9 |  | 28.7 |
| TAM-05 | Sloanea       | brevipes                 | 11.5 |  | 20.7 |
| TAM-06 | Sapium        | marmieri                 | 7.6  |  | 28   |
| TAM-06 | Inga          | alba                     | 7.3  |  | 22   |
| TAM-06 | Ficus         | schultesii               | 13.2 |  | 23   |
| TAM-06 | Pterocarpus   | rohrii                   | 7.1  |  | 24.8 |
| TAM-06 | Pseudolmedia  | laevis                   | 7.4  |  | 19.7 |
| TAM-06 | unidentified  | unidentified             | 7.2  |  | 24.4 |
| TAM-06 | Sorocea       | pileata                  | 9.1  |  | 22.7 |
| TAM-06 | Dipteryx      | alata                    | 16.4 |  | 26.4 |
| TAM-06 | Sorocea       | trophoides               | 9.9  |  | 20.4 |
| TAM-06 | Bertolletia   | excelsa                  | 14.8 |  |      |
| TAM-06 | Brosimum      | sp.                      | 4    |  | 14   |
| TAM-06 | Celtis        | schippii                 | 9.8  |  | 23   |
| TAM-06 | Clarisia      | racemosa                 | 8.2  |  | 22.4 |
| ALP-30 | Tachigali     | bracteosa                | 4.4  |  | 22.9 |
| ALP-30 | Brosimum      | potabile                 | 5.6  |  | 16.5 |
| ALP-30 | Sloanea       | floribunda               | 5.6  |  | 13.6 |
| ALP-30 | Micrandra     | spruceana                | 2    |  | 7.1  |
| ALP-30 | Simarouba     | amara                    | 8.4  |  | 20.5 |
| ALP-30 | Humiria       | balsamifera              | 7.6  |  | 15.7 |
| ALP-30 | Ocotea        | aciphylla                | 8.2  |  | 16.2 |
| ALP-30 | Aspidosperma  | desmanthum               | 10   |  | 27.4 |
| ALP-30 | Diplotropis   | sp                       | 13.6 |  | 31   |
| ALP-30 | Guatteria     | decurrens                | 5.7  |  | 14.7 |
| ALP-30 | Micrandra     | elata                    | 2.5  |  | 11   |
| ALP-30 | Ocotea        | myriantha                | 4.6  |  | 14.3 |
| ALP-30 | Aspidosperma  | excelsum                 | 3.9  |  | 21.4 |
| ALP-30 | Calyptranthes | bipennis                 | 3.9  |  | 12.8 |
| ALP-30 | Aniba         | perutilis                | 8.2  |  | 15.3 |
| ALP-30 | Macrolobium   | microcalyx               | 7.7  |  | 8.5  |
| ALP-30 | Virola        | pavonis                  | 12.7 |  | 16.6 |
| ALP-30 | Licania       | unguiculata              | 11.1 |  | 18.5 |
| ALP-30 | Tapirira      | guianensis               | 6.5  |  | 12.2 |
| ALP-30 | Roucheria     | schomburgkii             | 6.1  |  | 15.6 |
| ALP-30 | Emmotum       | floribundum              | 2.9  |  | 5.6  |
| ALP-01 | Dipteryx      | micrantha                | 11.4 |  | 16.6 |

|        |                |                                   |      |  |      |
|--------|----------------|-----------------------------------|------|--|------|
| ALP-01 | Pouteria       | subrotata                         | 11.6 |  | 26.7 |
| ALP-01 | Licania        | arachnoidea                       | 6.9  |  | 7.5  |
| ALP-01 | Guatteria      | schomburgkiana                    | 2.9  |  | 22.1 |
| ALP-01 | Minuartia      | guianensis                        | 9.7  |  | 19.3 |
| ALP-01 | Iryanthera     | lancifolia                        | 12.7 |  | 21.9 |
| ALP-01 | Hevea          | pauciflora                        | 0.9  |  | 4.5  |
| ALP-01 | Chaunochiton   | kappleri                          | 7.5  |  | 17.7 |
| ALP-01 | Cespedesia     | spathulata                        | 4.2  |  | 22.5 |
| ALP-01 | Taralea        | oppositifolia                     | 1.9  |  | 7    |
| ALP-01 | Brosimum       | rubescens                         | 2.9  |  | 12   |
| ALP-01 | Swartzia       | polyphylla                        | 7.4  |  | 17.9 |
| ALP-01 | Ruptiliocarpon | caracolito                        | 5.5  |  | 15.6 |
| ALP-01 | Caraipa        | punctulata                        | 9.5  |  | 23.1 |
| ALP-01 | Senefeldera    | inclinata                         | 2.3  |  | 18.6 |
| ALP-01 | Pourouma       | guianensis<br>subsp.<br>guianensi | 15.9 |  | 19.3 |
| ALP-01 | Hevea          | pauciflora                        | 10.2 |  | 19   |
| ALP-01 | Inga           | striata                           | 11.9 |  | 21.6 |

206

207

## Supplementary 4 Carbon budget quantification for West

208

### African carbon fluxes

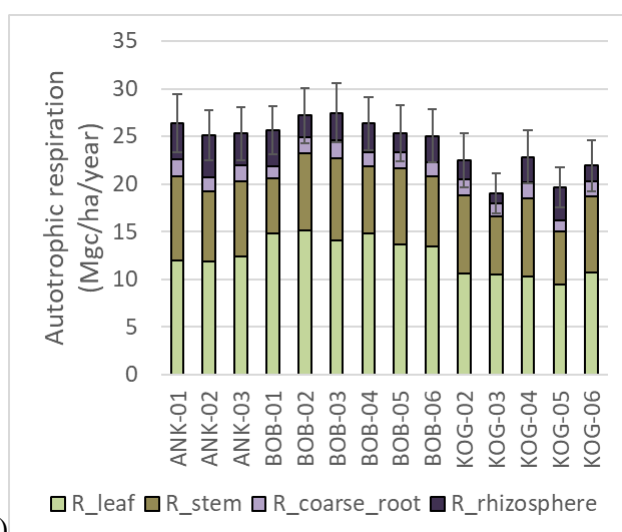

209

(a)

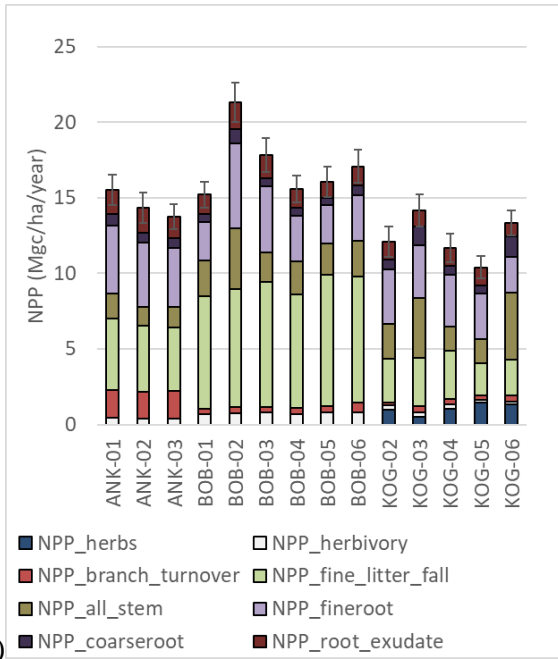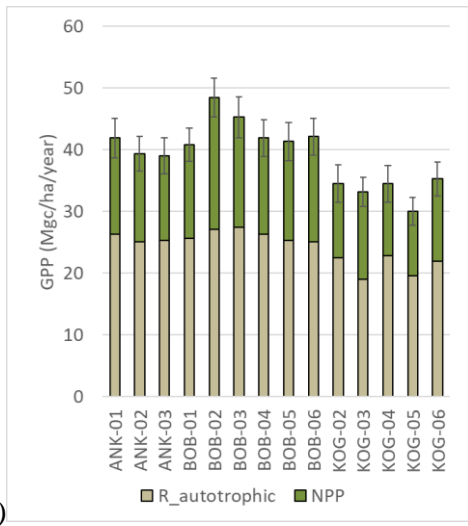

212 *Figure S2. Components of the carbon budgets. Panel (a) shows autotrophic respiration*  
 213 *(R<sub>autotrophic</sub>). Panel (b) shows components of net primary production (NPP). Panel (c) shows gross*  
 214 *primary production (NPP).*

215

216



Site: ANK

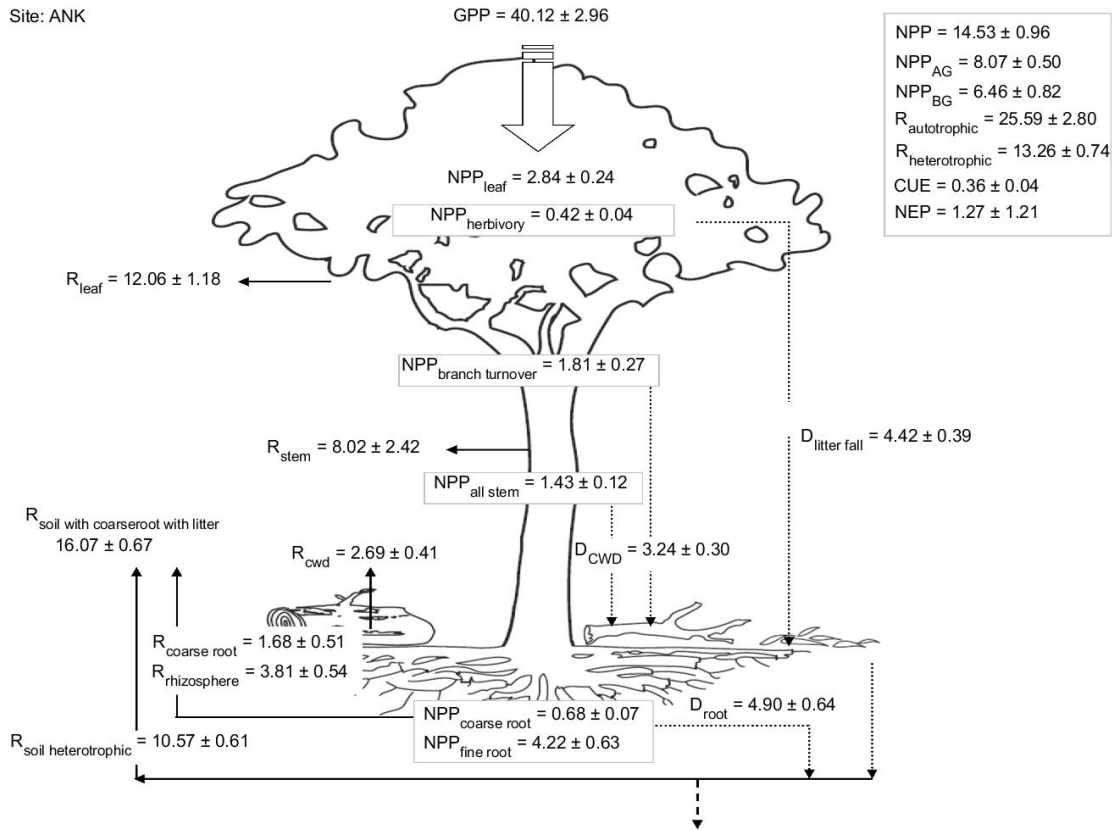

217

Site: BOB

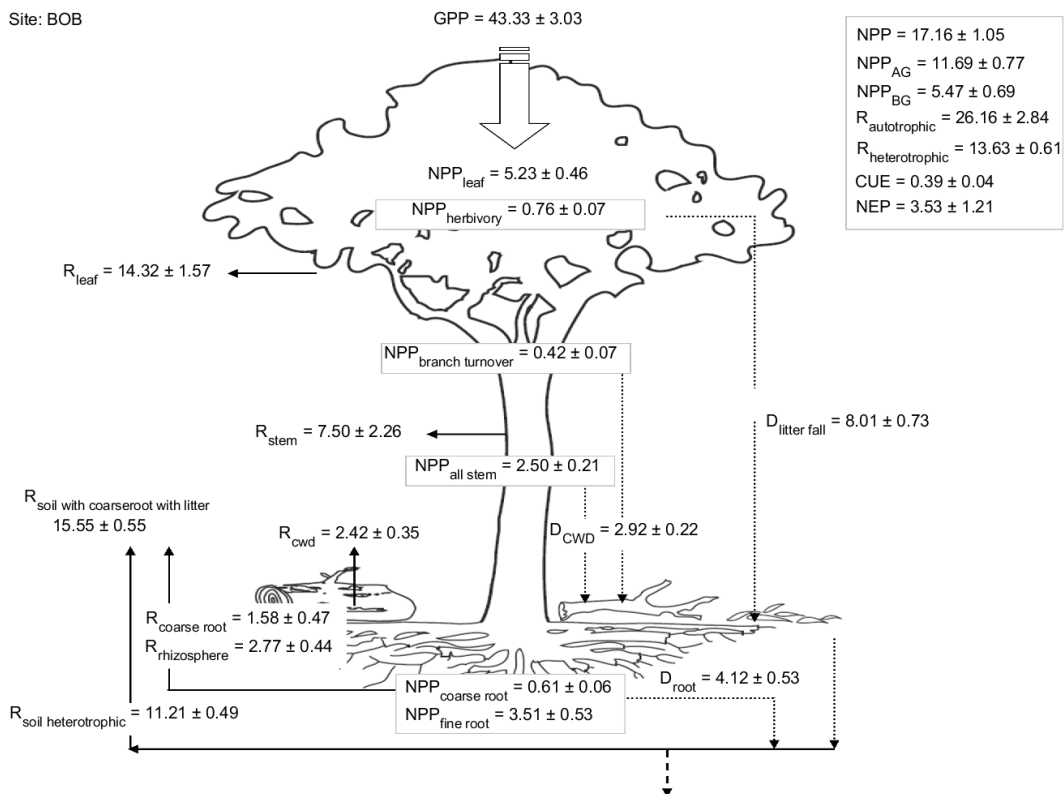

218

Site: KOG

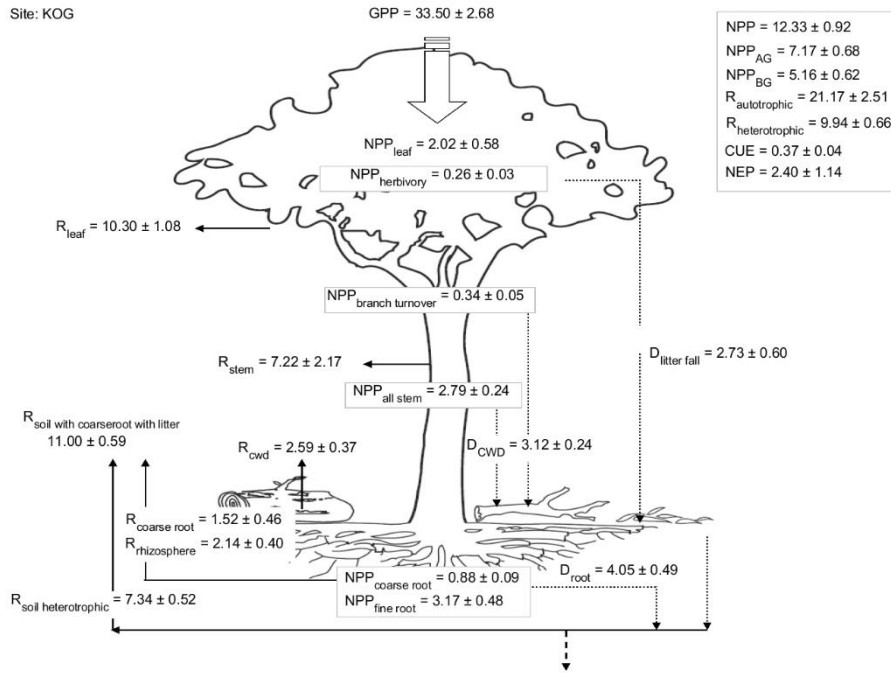

219

220 *Figure S3. Full carbon budgets visualised on a tree diagram. The diagrams show the magnitude*  
221 *and pattern of key carbon fluxes for ANK (mean of 3 plots) BOB (mean of 6 plots) and KOG (mean of 5*  
222 *plots)*

223

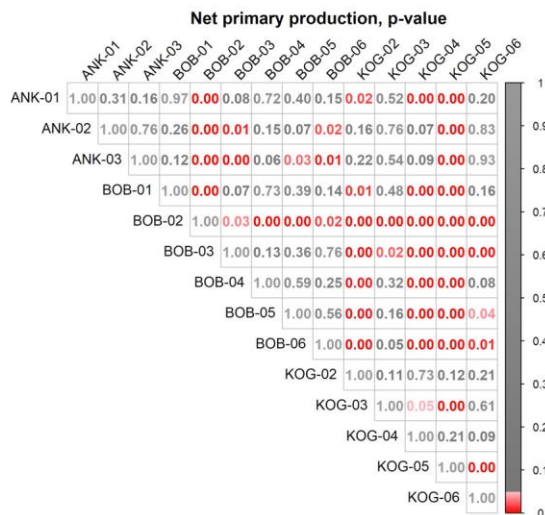

224

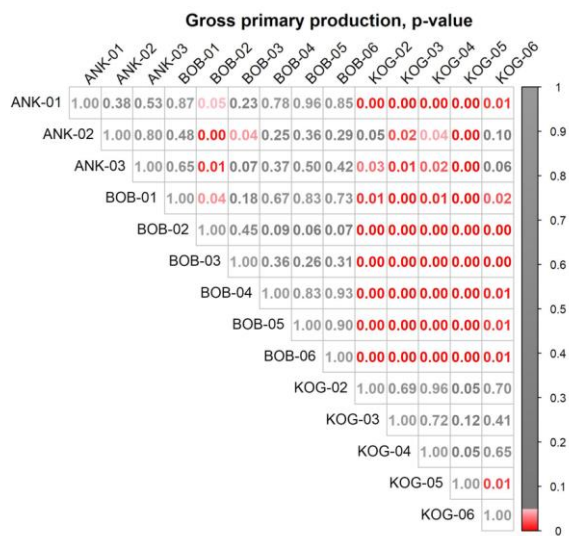

225

226 *Figure S 4. Z-test and P-value for plot to plot comparison. Z-test was used to compare the*  
 227 *difference between plots for net primary production (NPP) and gross primary production (GPP). P*  
 228 *values between each plot were shown to illustrate significant (red, at 0.05 threshold) and insignificant*  
 229 *(grey).*

230

231

232

233

## Supplementary 5 Photographs of the site

234

### Ankasa

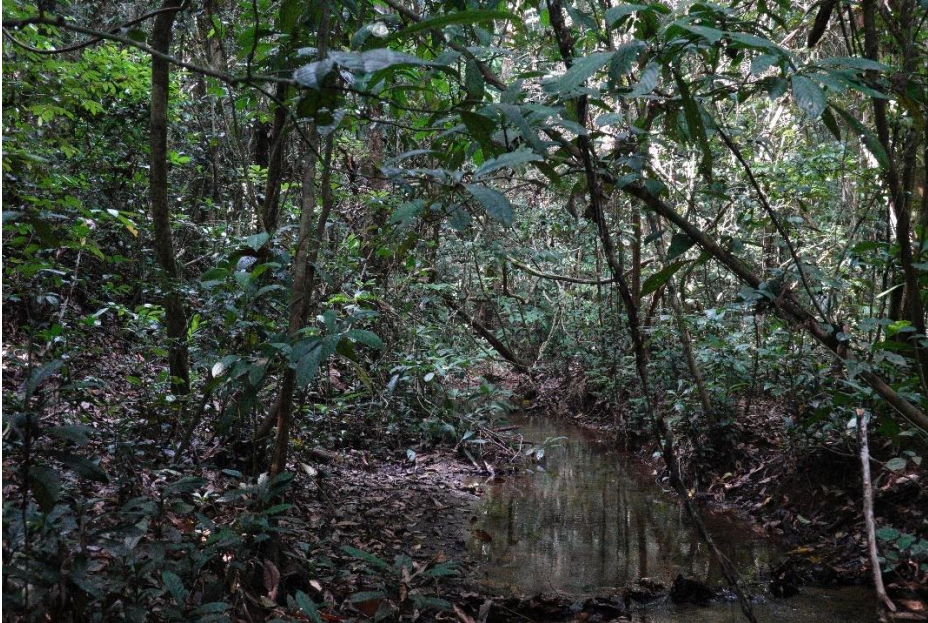

235

236 There is a stream running through ANK03 which largely floods the plot in the wet season.  
237 Ankasa - ANK01

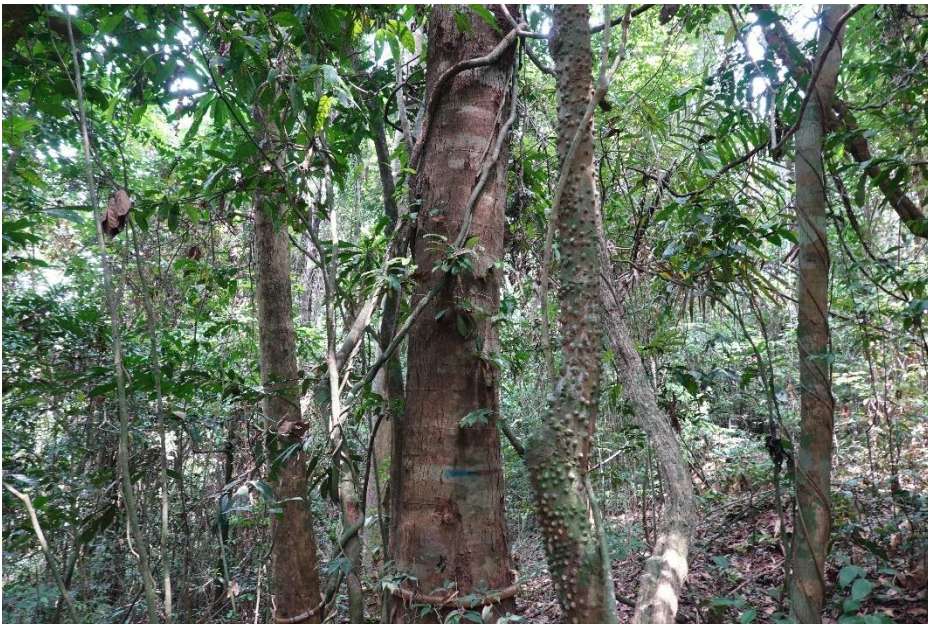

238

239 ANK01 and ANK02 are located on well-drained local hilltops.

240

**Bobiri - BOB01**

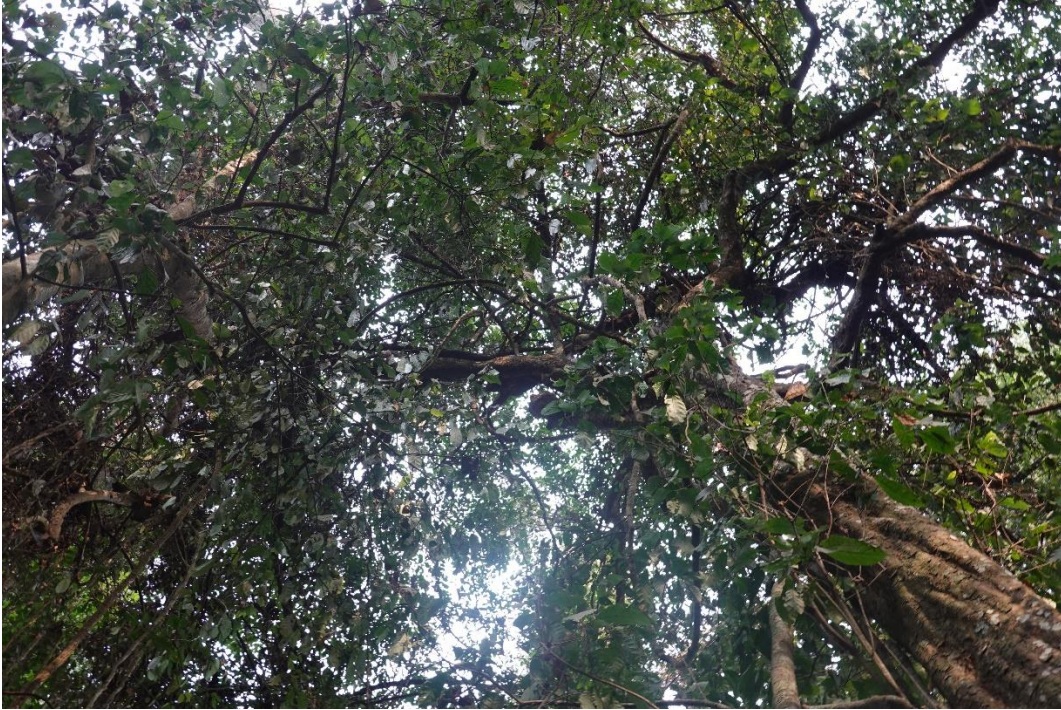

241

242

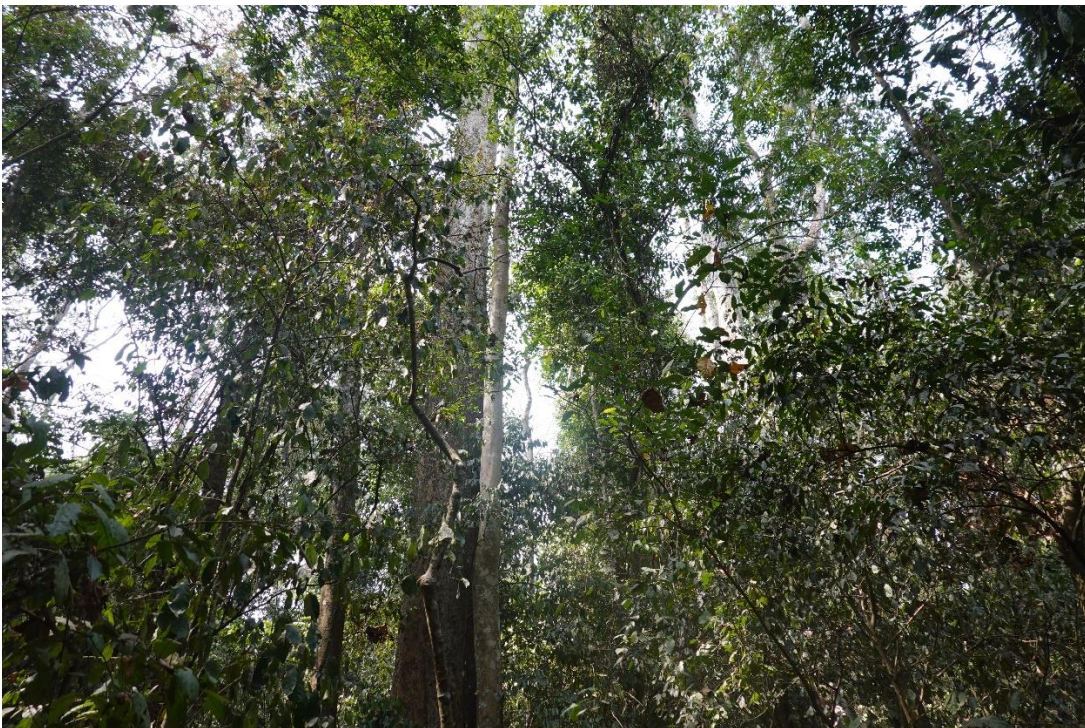

243

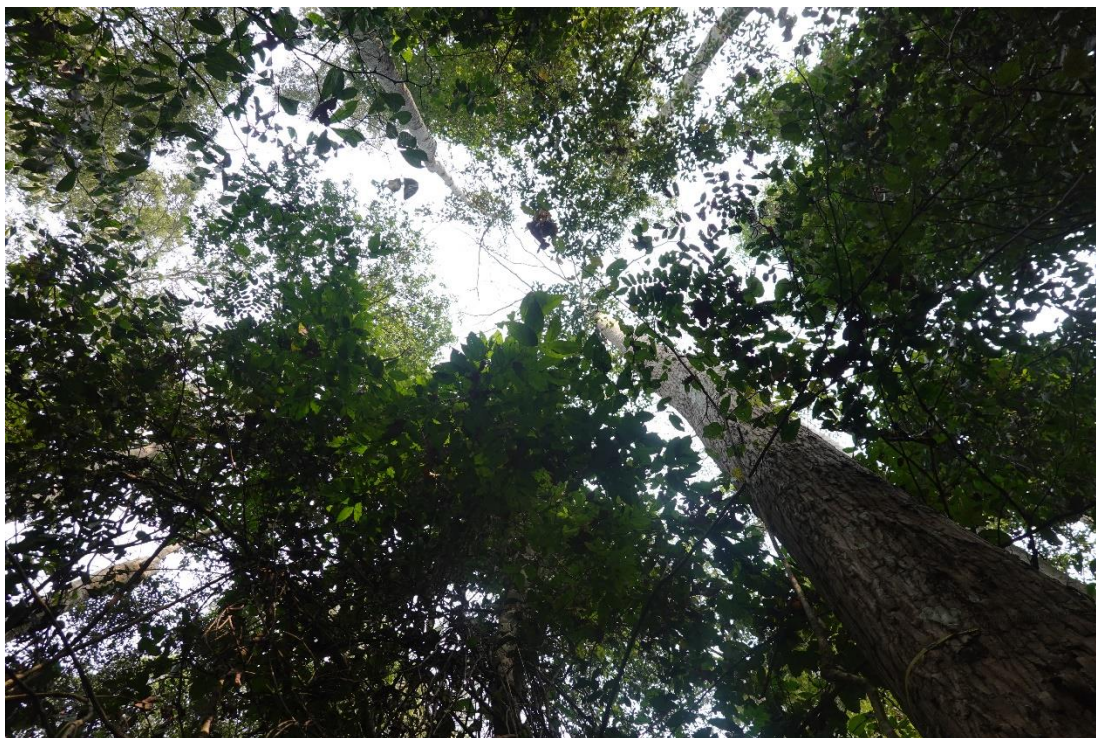

245

246 Photo Credit: all photos above were taken by Huanyuan Zhang-Zheng in January 2022.

247

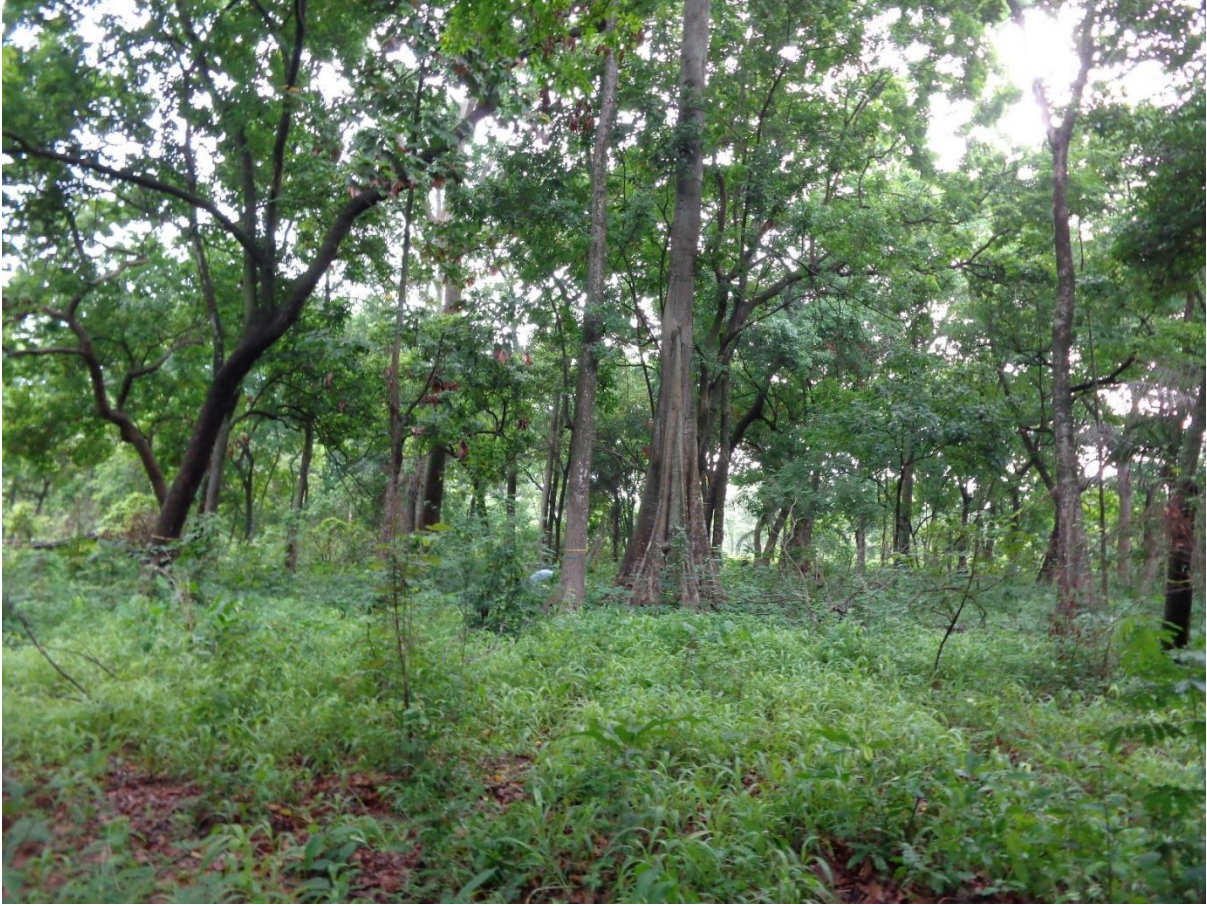

249

250 Photo Credit: the photo was shared by Akwasi Duah-Gyamfi. The photo was taken on 16 July  
251 2013,

252

## **Kogaye - KOG02**

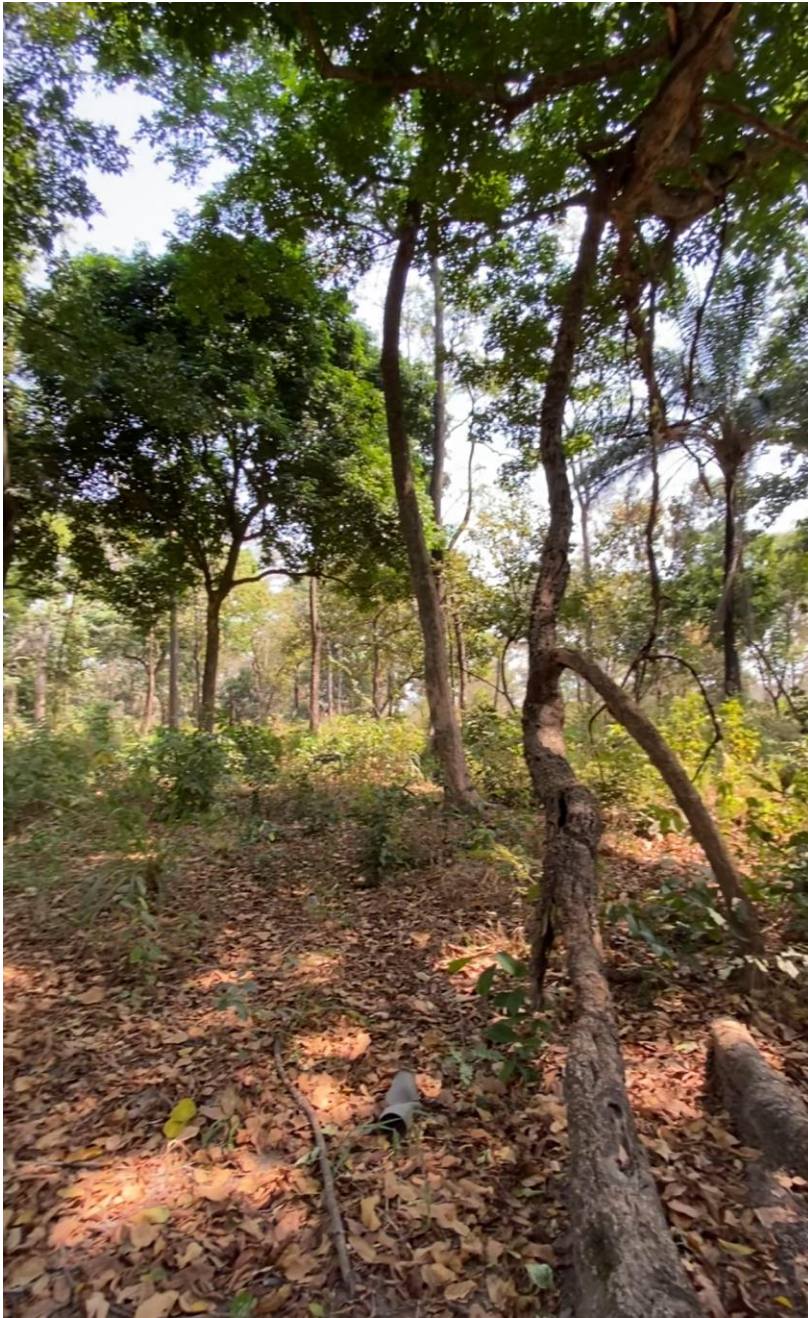

253

254 Photo Credit: taken by Huanyuan Zhang-Zheng in January 2022.

255

## **Kogaye - KOG04**

256



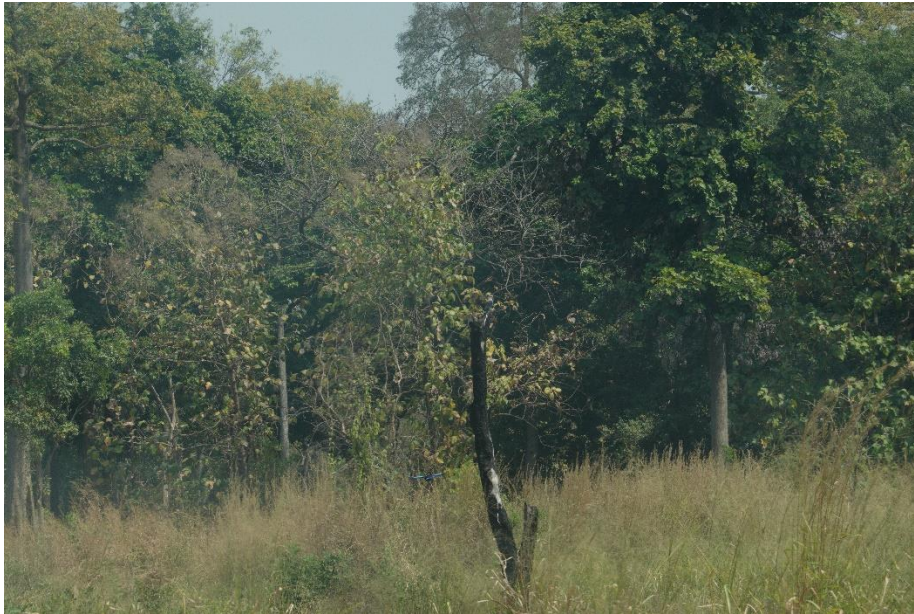

257

258 This is at the forest-savanna transition. Photo Credit: taken by Huanyuan Zhang-Zheng in  
259 January 2022.

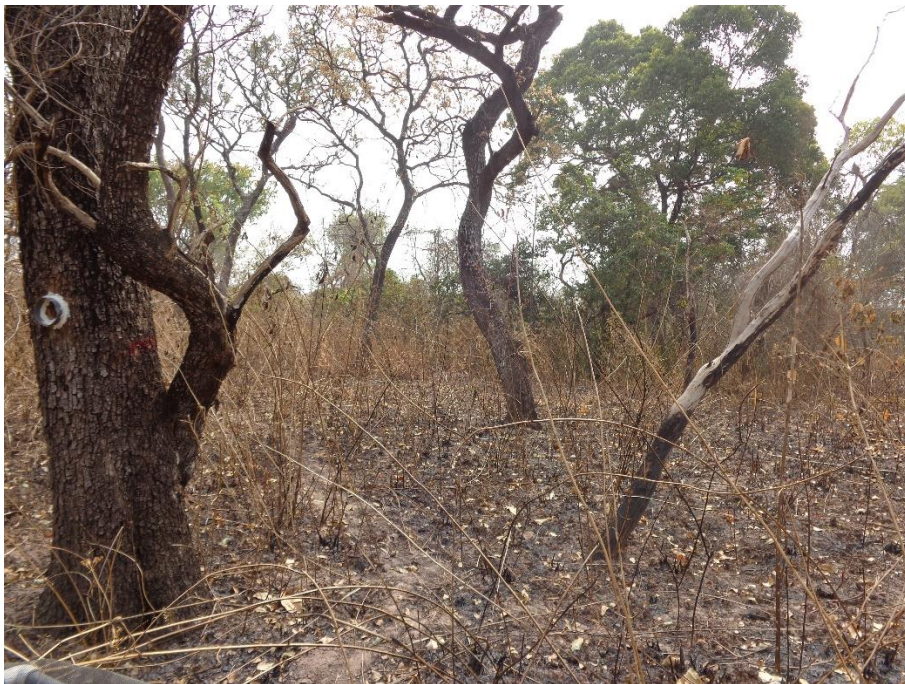

260

261 This plot rarely burns (as told by locals), but it looks like this when it does burn. Photo  
262 Credit: the photo was shared by Akwasi Duah-Gyamfi. The photo was taken on 03 February  
263 2014,

264

265

266

## Kogaye - KOG05

267

268

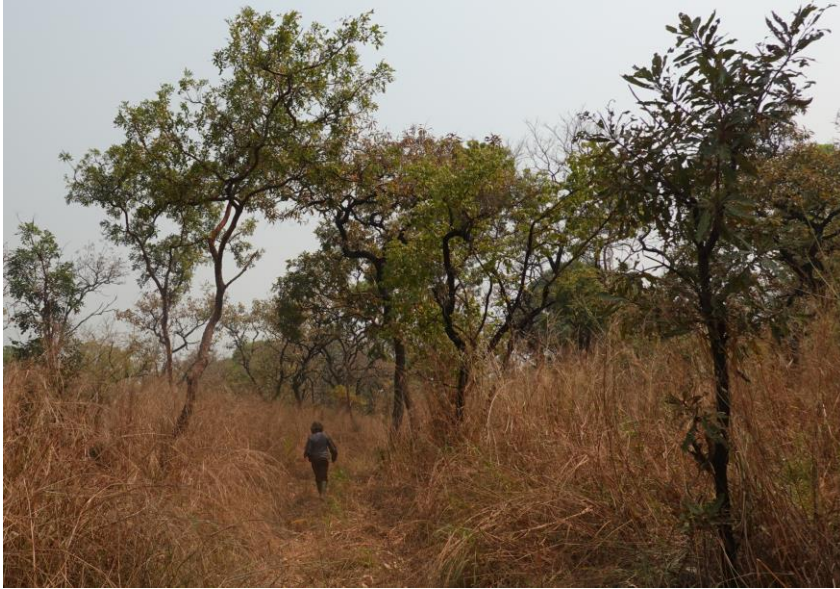

269

270 Photo Credit: taken by Huanyuan Zhang-Zheng in January 2022.

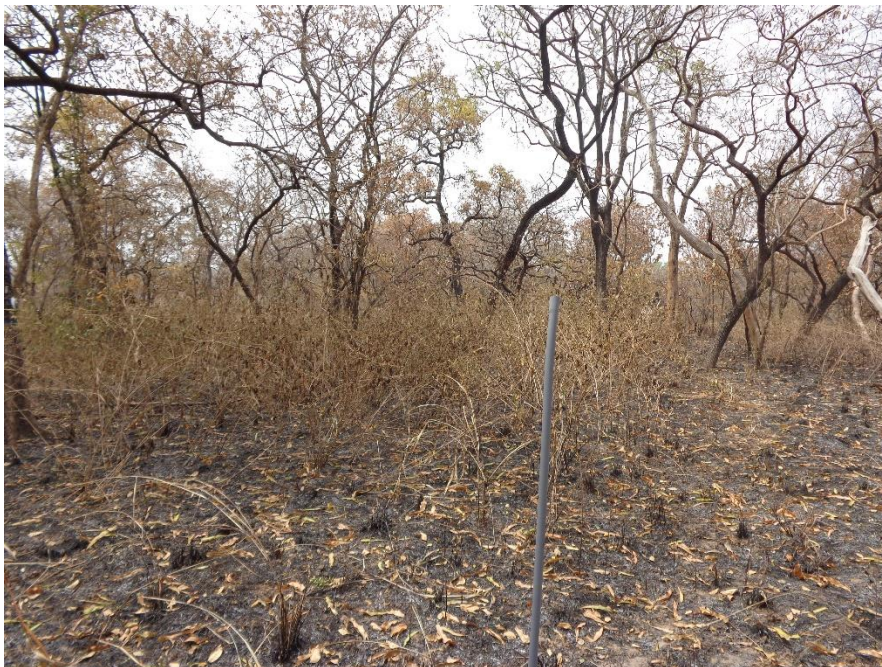

271

272 This plot frequently burns. Photo Credit: the photo was shared by Akwasi Duah-Gyamfi. The  
273 photo was taken on 06 February 2014,

274

275 **Supplementary References**

276

277

278 1. Berg, S. *et al.* ilastik: interactive machine learning for (bio)image analysis. *Nat*  
279 *Methods* **16**, (2019).

280 2. Demarez, V., Duthoit, S., Baret, F., Weiss, M. & Dedieu, G. Estimation of leaf  
281 area and clumping indexes of crops with hemispherical photographs. *Agric For*  
282 *Meteorol* **148**, (2008).

283 3. Zhang, Y., Chen, J. M. & Miller, J. R. Determining digital hemispherical  
284 photograph exposure for leaf area index estimation. in *Agricultural and Forest*  
285 *Meteorology* vol. 133 (2005).

286 4. Malhi, Y. *et al.* The Global Ecosystems Monitoring network: Monitoring  
287 ecosystem productivity and carbon cycling across the tropics. *Biol Conserv* **253**, 108889  
288 (2021).

289 5. Zhang-Zheng, H. *et al.* Photosynthetic and water transport strategies of plants  
290 along a tropical forest aridity gradient: a test of optimality theory. *bioRxiv*  
291 2023.01.10.523419 (2023) doi:10.1101/2023.01.10.523419.

292 6. Mujawamariya, M. *et al.* Complete or overcompensatory thermal acclimation  
293 of leaf dark respiration in African tropical trees. *New Phytologist* **229**, (2021).

294 7. Doughty, C. E. & Goulden, M. L. Seasonal patterns of tropical forest leaf area  
295 index and CO<sub>2</sub> exchange. *J Geophys Res Biogeosci* **114**, (2009).

296 8. Malhi, Y. *et al.* Comprehensive assessment of carbon productivity, allocation  
297 and storage in three Amazonian forests. *Glob Chang Biol* **15**, 1255–1274 (2009).

298 9. Chambers, J. Q. *et al.* Respiration from a tropical forest ecosystem: Partitioning  
299 of sources and low carbon use efficiency. *Ecological Applications* **14**, (2004).

- 300           10. Jackson, R. B. *et al.* A global analysis of root distributions for terrestrial biomes.  
301           *Oecologia* **108**, (1996).
- 302           11. Cairns, M. A., Brown, S., Helmer, E. H. & Baumgardner, G. A. Root biomass  
303           allocation in the world's upland forests. *Oecologia* **111**, (1997).
- 304           12. Malhi, Y. *et al.* The productivity, metabolism and carbon cycle of two lowland  
305           tropical forest plots in south-western Amazonia, Peru. *Plant Ecol Divers* **7**, 85–105  
306           (2014).
- 307           13. Metcalfe, D. B. *et al.* Factors controlling spatio-temporal variation in carbon  
308           dioxide efflux from surface litter, roots, and soil organic matter at four rain forest sites  
309           in the eastern Amazon. *J Geophys Res Biogeosci* **112**, (2007).
- 310           14. Riutta, T. *et al.* Major and persistent shifts in below-ground carbon dynamics  
311           and soil respiration following logging in tropical forests. *Glob Chang Biol* **27**, 2225–  
312           2240 (2021).
- 313           15. Finzi, A. C. *et al.* Rhizosphere processes are quantitatively important  
314           components of terrestrial carbon and nutrient cycles. *Glob Chang Biol* **21**, (2015).
- 315           16. Abramoff, R. Z. & Finzi, A. C. Seasonality and partitioning of Root allocation  
316           to rhizosphere soils in a midlatitude forest. *Ecosphere* **7**, (2016).
- 317           17. Sun, L. *et al.* Root exudation as a major competitive fine-root functional trait of  
318           18 coexisting species in a subtropical forest. *New Phytologist* **229**, (2021).
- 319           18. Chambers, J. Q., Schimel, J. P. & Nobre, A. D. Respiration from coarse wood  
320           litter in central Amazon forests. *Biogeochemistry* **52**, (2001).
- 321           19. Yoon, T. K., Noh, N. J., Kim, S., Han, S. & Son, Y. Coarse woody debris  
322           respiration of Japanese red pine forests in Korea: controlling factors and contribution to  
323           the ecosystem carbon cycle. *Ecol Res* **30**, (2015).

- 324 20.Mills, M. B. *et al.* Tropical forests post-logging are a persistent net carbon  
325 source to the atmosphere. *Proc Natl Acad Sci U S A* **120**, (2023).
- 326 21.Moore, S. *et al.* Forest biomass, productivity and carbon cycling along a rainfall  
327 gradient in West Africa. *Glob Chang Biol* **24**, e496–e510 (2018).
- 328 22.Rocha, W. *et al.* Ecosystem productivity and carbon cycling in intact and  
329 annually burnt forest at the dry southern limit of the Amazon rainforest (Mato Grosso,  
330 Brazil). *Plant Ecol Divers* **7**, (2014).
- 331 23.Araujo-Murakami, A. *et al.* The productivity, allocation and cycling of carbon  
332 in forests at the dry margin of the Amazon forest in Bolivia. *Plant Ecol Divers* **7**, 55–69  
333 (2014).
- 334 24.del Aguila-Pasquel, J. *et al.* The seasonal cycle of productivity, metabolism and  
335 carbon dynamics in a wet aseasonal forest in north-west Amazonia (Iquitos, Peru). *Plant*  
336 *Ecol Divers* **7**, 71–83 (2014).
- 337 25.da Costa, A. C. L. *et al.* Ecosystem respiration and net primary productivity  
338 after 8-10 years of experimental through-fall reduction in an eastern Amazon forest.  
339 *Plant Ecol Divers* **7**, (2014).
- 340 26.Doughty, C. E. *et al.* The production, allocation and cycling of carbon in a forest  
341 on fertile terra preta soil in eastern Amazonia compared with a forest on adjacent  
342 infertile soil. *Plant Ecol Divers* **7**, 41–53 (2014).
- 343 27.Oliveras, I. *et al.* The influence of taxonomy and environment on leaf trait  
344 variation along tropical abiotic gradients. *Frontiers in Forests and Global Change* **3**, 18  
345 (2020).
- 346 28.Metcalf, D. B. *et al.* Impacts of experimentally imposed drought on leaf  
347 respiration and morphology in an Amazon rain forest. *Funct Ecol* **24**, (2010).

- 348                   29. Malhi, Y. *et al.* The linkages between photosynthesis, productivity, growth and  
349 biomass in lowland Amazonian forests. *Glob Chang Biol* **21**, (2015).
- 350                   30. Bahar, N. H. A. *et al.* Leaf-level photosynthetic capacity in lowland Amazonian  
351 and high-elevation Andean tropical moist forests of Peru. *New Phytologist* **214**, 1002–  
352 1018 (2017).
- 353                   31. Flack-Prain, S., Meir, P., Malhi, Y., Smallman, T. L. & Williams, M. Leaf Area  
354 Index Changes Explain GPP Variation across an Amazon Drought Stress Gradient.  
355 *Biogeosciences Discussions* (2019).
- 356                   32. Imteaz, M. A. & Hossain, I. Climate Change Impacts on ‘Seasonality Index’  
357 and its Potential Implications on Rainwater Savings. *Water Resources Management* **37**,  
358 (2023).
- 359                   33. Muñoz-Sabater, J. *et al.* ERA5-Land: A state-of-the-art global reanalysis dataset  
360 for land applications. *Earth Syst Sci Data* **13**, (2021).
- 361
