# Supplementary material for: Contrasting carbon cycle along tropical forest aridity gradients in West Africa and Amazonia
Source: PubMed Central journal article supplement (PMC11009382; doi:10.1038/s41467-024-47202-x), 2024-04-11
Supplement: 41467_2024_47202_MOESM3_ESM.pdf [file 41467_2024_47202_MOESM3_ESM.pdf]

## **Description of Additional Supplementary Files**

File Name: Supplementary Data 1

Description: Abbreviation for components of NPP, respiration and detritus carbon flux. See Supplementary Information for detailed field protocol and calculation procedures. Data at site ANK BOB and KOG were retrieved from a previous study 10 except NPP\_root\_exudate.
